# Supplementary material for: The spin–orbit effects on platinabenzene: a ring current and electron delocalization approach
Source: Royal Society of Chemistry journal article supplement (doi:10.1039/d2nj03317h), 2022-01-01
Supplement: d2nj03317h1.pdf [file d2nj03317h1.pdf]

**Supporting information for:**

**The Spin-Orbit Effects on Platinabenzene:**

**A Ring current and electron delocalization**

**approach**

David Arias-Olivares<sup>1\*</sup> and Dayán Páez-Hernández<sup>1\*</sup>

<sup>1</sup>Center of Applied Nanoscience (CANS), República 275, Santiago, Chile

\*Corresponding author: [dayan.paez@unab.cl](mailto:dayan.paez@unab.cl), [ndarioso@gmail.com](mailto:ndarioso@gmail.com)

\*Corresponding author: [dayan.paez@unab.cl](mailto:dayan.paez@unab.cl)

January 28, 2022

# S1 Nucleus-Independent Chemical Shift at M06-L and 0PBE

## Level of theories.

Here presented in Table S1 the data obtained for M06-L and in Table S2 the data obtained for OPBE with the Spin-Orbit Contribution. Table S3 the comparison between Non-Relativistic, Scalar Relativistic and Spin-Orbit level of theory for M06-L level of theory. The plotted information of the comparison level of theory are presented in Figure S1. The molecular plane are highlighted in bold.

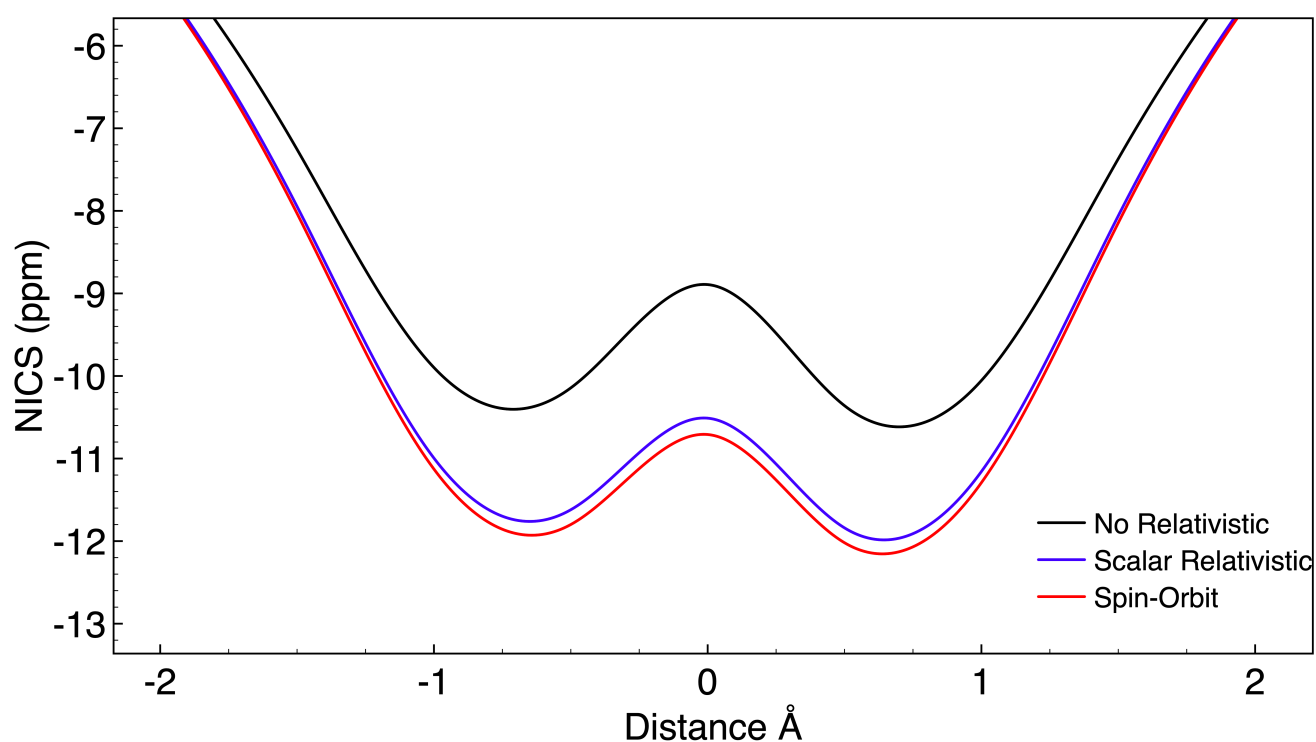

Figure S1: Comparison in the peak for different level of theory, No Relativistic, Scalar Relativistic and Spin-Orbit.

Table S1: NICS computed with M06-L Functional

| Position   | Paramagnetic  | Diamagnetic   | Total Shielding |
|------------|---------------|---------------|-----------------|
| -6.0       | -0.732        | 0.211         | -0.521          |
| -5.5       | -0.927        | 0.279         | -0.648          |
| -5.0       | -1.19         | 0.375         | -0.815          |
| -4.5       | -1.552        | 0.512         | -1.041          |
| -4.0       | -2.059        | 0.708         | -1.352          |
| -3.5       | -2.784        | 0.989         | -1.796          |
| -3.0       | -3.847        | 1.386         | -2.461          |
| -2.5       | -5.434        | 1.916         | -3.518          |
| -2.0       | -7.777        | 2.506         | -5.271          |
| -1.5       | -10.782       | 2.751         | -8.032          |
| -1.0       | -12.643       | 1.514         | -11.128         |
| -0.5       | -9.655        | -2.145        | -11.799         |
| <b>0.0</b> | <b>-5.993</b> | <b>-4.716</b> | <b>-10.709</b>  |
| 0.5        | -10.02        | -2.001        | -12.02          |
| 1.0        | -12.88        | 1.588         | -11.292         |
| 1.5        | -10.899       | 2.753         | -8.146          |
| 2.0        | -7.855        | 2.492         | -5.363          |
| 2.5        | -5.498        | 1.905         | -3.592          |
| 3.0        | -3.898        | 1.38          | -2.518          |
| 3.5        | -2.825        | 0.987         | -1.838          |
| 4.0        | -2.091        | 0.708         | -1.383          |
| 4.5        | -1.577        | 0.512         | -1.065          |
| 5.0        | -1.21         | 0.376         | -0.834          |
| 5.5        | -0.943        | 0.28          | -0.663          |
| 6.0        | -0.745        | 0.211         | -0.533          |

Table S2: NICS computed with OPBE Functional

| Position   | Paramagnetic  | Diamagnetic   | Spin-Ortbit  | Total Shielding |
|------------|---------------|---------------|--------------|-----------------|
| -6.0       | -0.54         | 0.246         | -0.002       | -0.297          |
| -5.5       | -0.706        | 0.325         | -0.003       | -0.384          |
| -5.0       | -0.939        | 0.436         | -0.004       | -0.507          |
| -4.5       | -1.271        | 0.593         | -0.005       | -0.682          |
| -4.0       | -1.751        | 0.819         | -0.007       | -0.939          |
| -3.5       | -2.455        | 1.142         | -0.011       | -1.323          |
| -3.0       | -3.491        | 1.599         | -0.02        | -1.912          |
| -2.5       | -4.998        | 2.214         | -0.042       | -2.825          |
| -2.0       | -7.055        | 2.927         | -0.095       | -4.223          |
| -1.5       | -9.272        | 3.347         | -0.206       | -6.132          |
| -1.0       | -9.723        | 2.351         | -0.326       | -7.699          |
| -0.5       | -5.409        | -1.014        | -0.175       | -6.598          |
| <b>0.0</b> | <b>-1.275</b> | <b>-3.415</b> | <b>0.098</b> | <b>-4.591</b>   |
| 0.5        | -5.776        | -0.86         | -0.199       | -6.835          |
| 1.0        | -9.969        | 2.434         | -0.349       | -7.884          |
| 1.5        | -9.386        | 3.352         | -0.222       | -6.256          |
| 2.0        | -7.115        | 2.911         | -0.105       | -4.308          |
| 2.5        | -5.036        | 2.199         | -0.047       | -2.884          |
| 3.0        | -3.52         | 1.589         | -0.023       | -1.954          |
| 3.5        | -2.478        | 1.136         | -0.013       | -1.354          |
| 4.0        | -1.77         | 0.816         | -0.008       | -0.962          |
| 4.5        | -1.285        | 0.591         | -0.006       | -0.7            |
| 5.0        | -0.95         | 0.434         | -0.004       | -0.52           |
| 5.5        | -0.714        | 0.323         | -0.003       | -0.394          |
| 6.0        | -0.546        | 0.244         | -0.003       | -0.304          |

Table S3: NICS computed with M06-L Functional with different approximations. Non Relativistic, Scalar relativistic and Spin-Orbit

| Position   | No Relativistic | Scalar Relativistic | Spin-Orbit     |
|------------|-----------------|---------------------|----------------|
| -6,0       | -0,502          | -0,519              | -0,521         |
| -5.5       | -0.623          | -0.645              | -0.648         |
| -5.0       | -0.782          | -0.812              | -0.815         |
| -4.5       | -0.994          | -1.036              | -1.041         |
| -4.0       | -1.285          | -1.344              | -1.352         |
| -3.5       | -1.695          | -1.784              | -1.796         |
| -3.0       | -2.302          | -2.443              | -2.461         |
| -2.5       | -3.254          | -3.489              | -3.518         |
| -2.0       | -4.817          | -5.221              | -5.271         |
| -1.5       | -7.256          | -7.947              | -8.032         |
| -1.0       | -9.898          | -10.995             | -11.128        |
| -0.5       | -10.144         | -11.62              | -11.799        |
| <b>0.0</b> | <b>-8.893</b>   | <b>-10.511</b>      | <b>-10.709</b> |
| 0.5        | -10.36          | -11.84              | -12.02         |
| 1.0        | -10.055         | -11.157             | -11.292        |
| 1.5        | -7.369          | -8.06               | -8.146         |
| 2.0        | -4.911          | -5.312              | -5.363         |
| 2.5        | -3.331          | -3.563              | -3.592         |
| 3.0        | -2.362          | -2.5                | -2.518         |
| 3.5        | -1.74           | -1.827              | -1.838         |
| 4.0        | -1.317          | -1.375              | -1.383         |
| 4.5        | -1.02           | -1.059              | -1.065         |
| 5.0        | -0.802          | -0.83               | -0.834         |
| 5.5        | -0.639          | -0.66               | -0.663         |
| 6,0        | -0,515          | -0,531              | -0,533         |

## S2 4-Component Relativistic Current Density Plots and its components

Here presented the slices for the Magnetically Induced Current (MICD) Density at 4-Components Relativistic Level of Theory and decomposition of Current densities. From left to right. Total MICD, Diamagnetic MICD and Paramagnetic MICD.

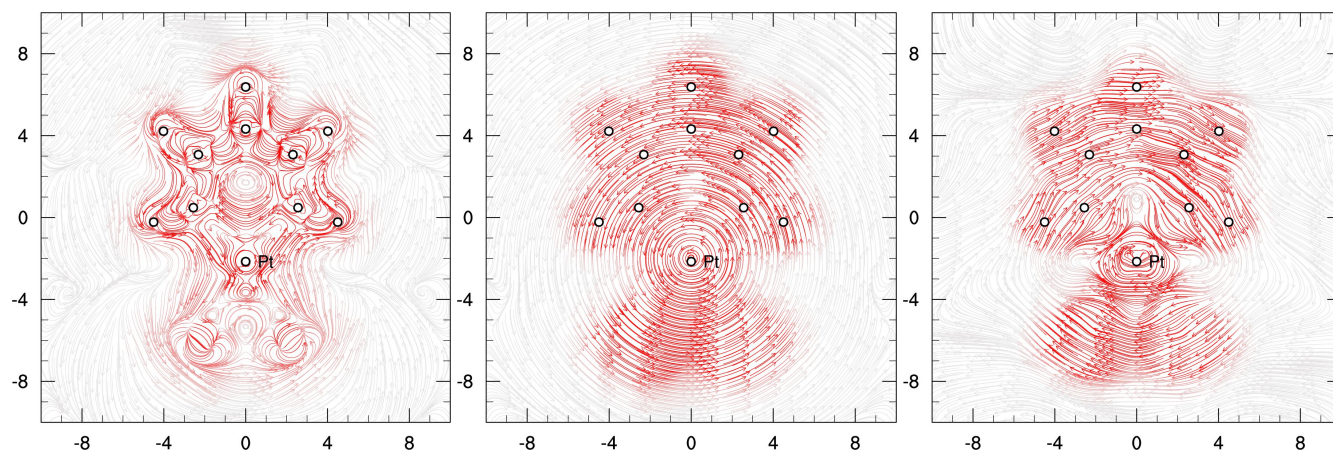

Figure S2: Plots for Magnetically Induced Current Density at  $0a_0$  from molecular plane

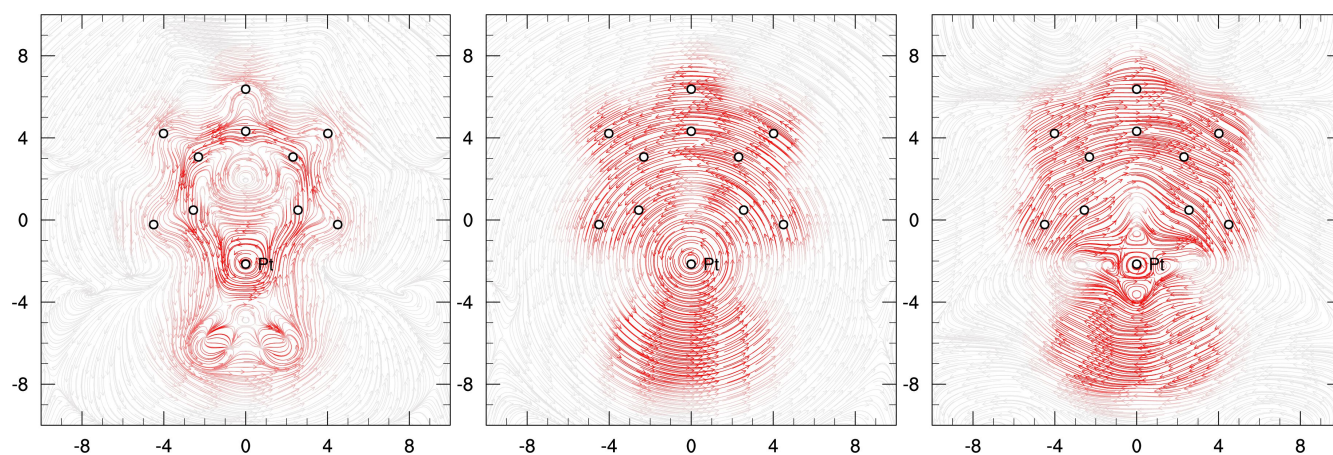

Figure S3: Plots for Magnetically Induced Current Density at  $1a_0$  from molecular plane

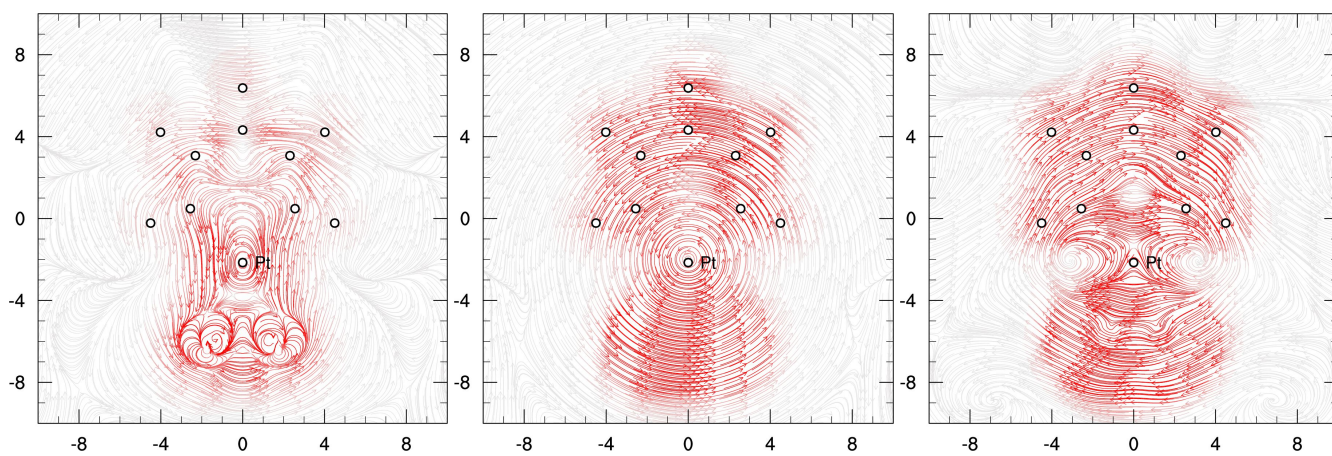

Figure S4: Plots for Magnetically Induced Current Density at  $2a_0$  from molecular plane

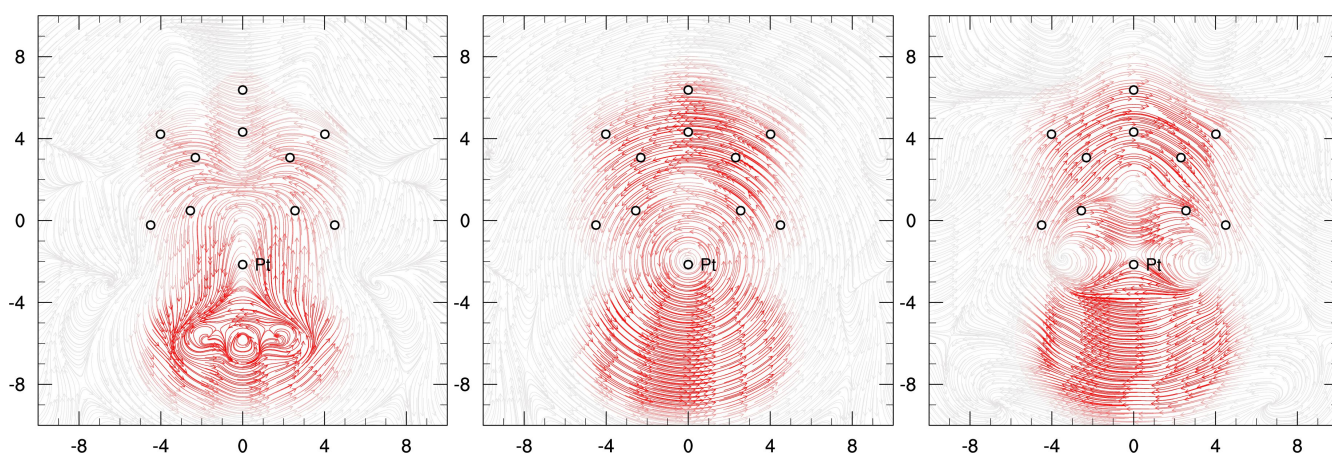

Figure S5: Plots for Magnetically Induced Current Density at  $3a_0$  from molecular plane

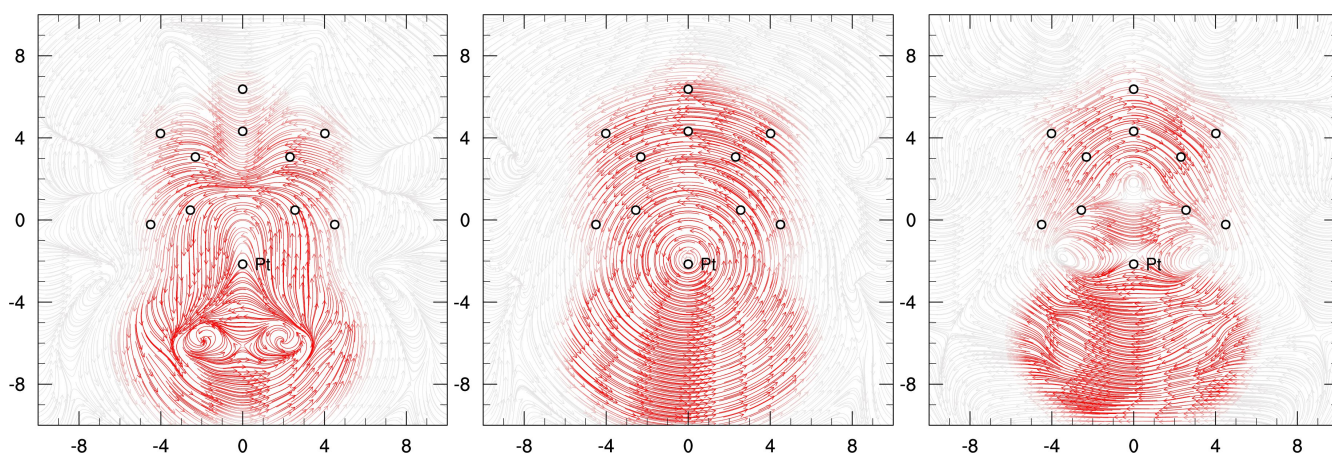

Figure S6: Plots for Magnetically Induced Current Density at  $4a_0$  from molecular plane

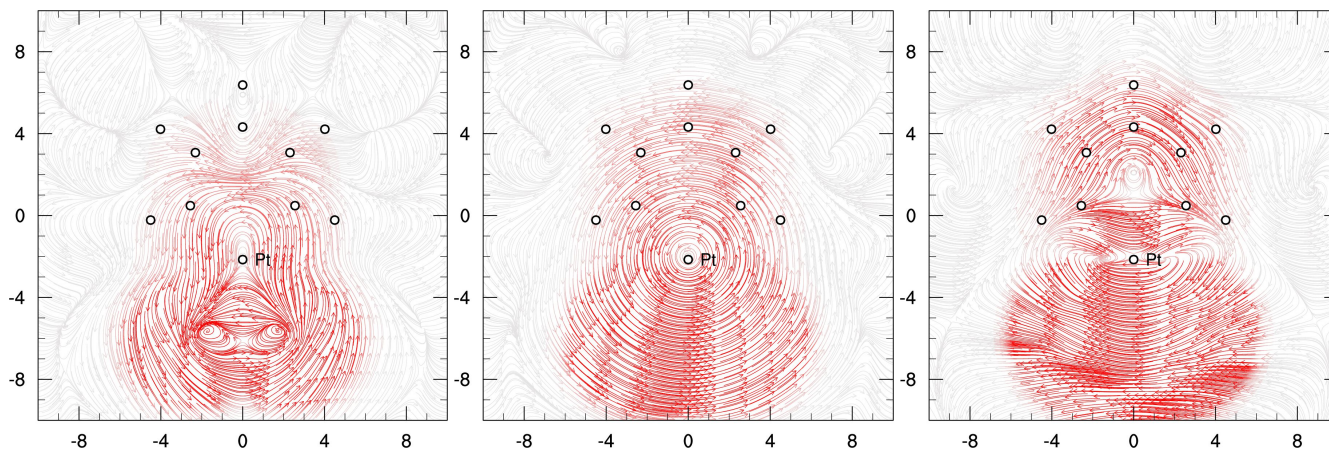

Figure S7: Plots for Magnetically Induced Current Density at  $5a_0$  from molecular plane



### S3 4-Component Relativistic Current Density Plots, Spin Free computation and, Spin-Orbit Effect

Here presented the slices for the Magnetically Induced Current (MICD) Density at 4-Components Relativistic Level of Theory and decomposition of Current densities. From left to right. Total MICD, Spin-Free MICD, and Spin-Orbit effect over the MICD.

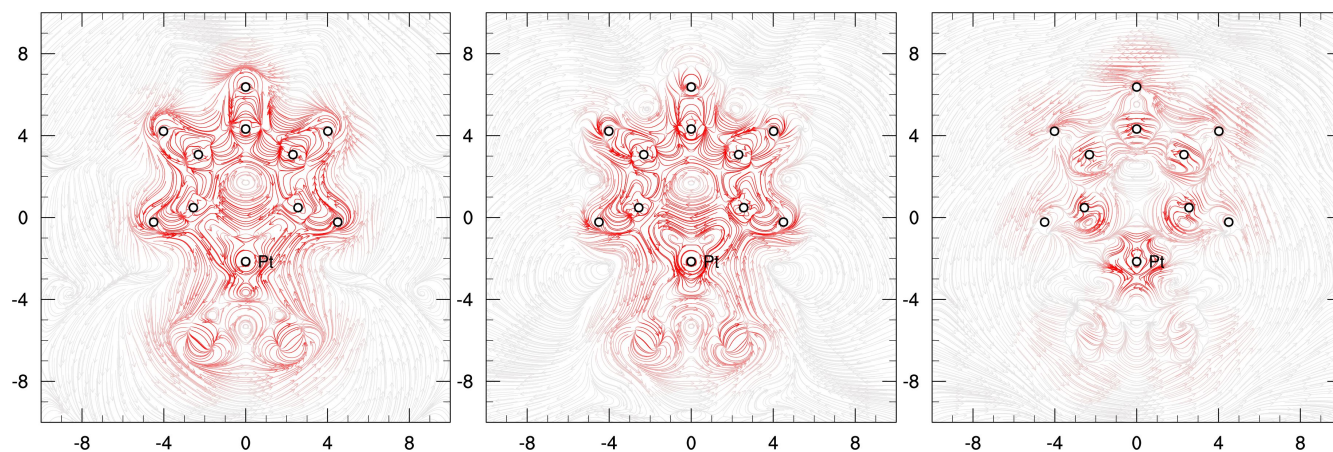

Figure S8: Plots for Magnetically Induced Current Density at  $0a_0$  from molecular plane

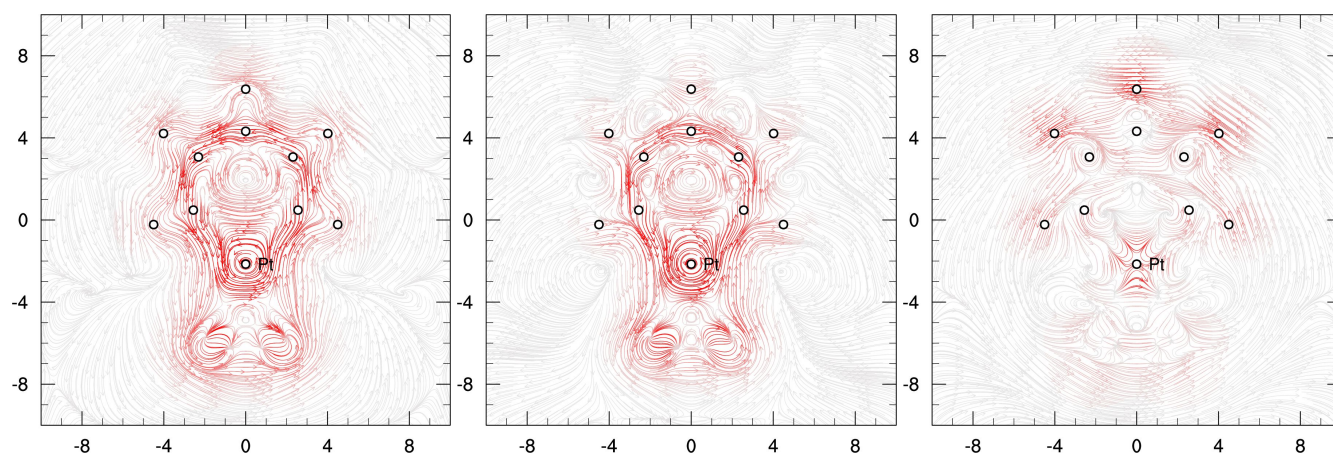

Figure S9: Plots for Magnetically Induced Current Density at  $1a_0$  from molecular plane

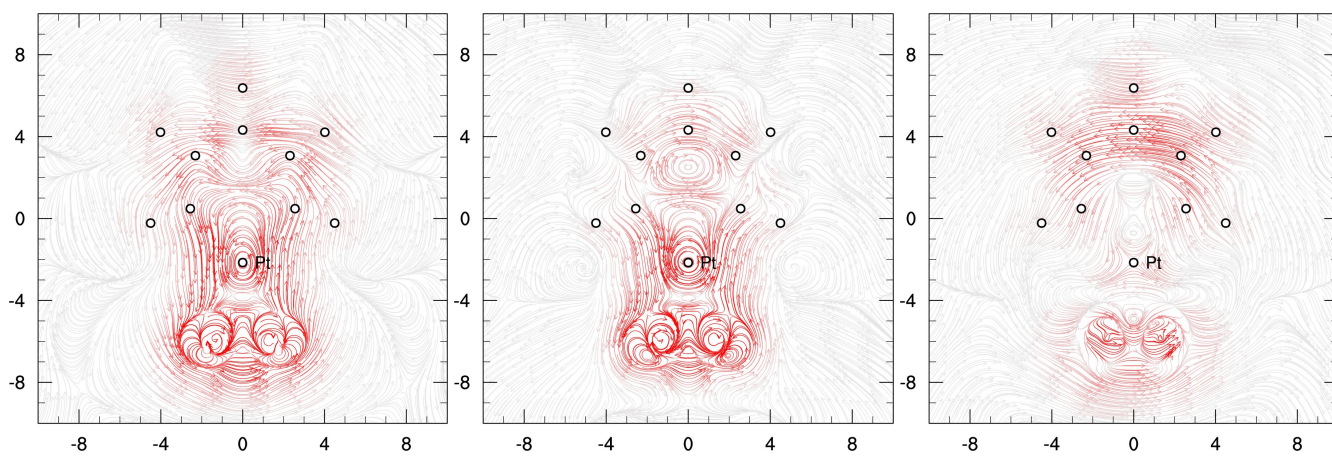

Figure S10: Plots for Magnetically Induced Current Density at  $2a_0$  from molecular plane

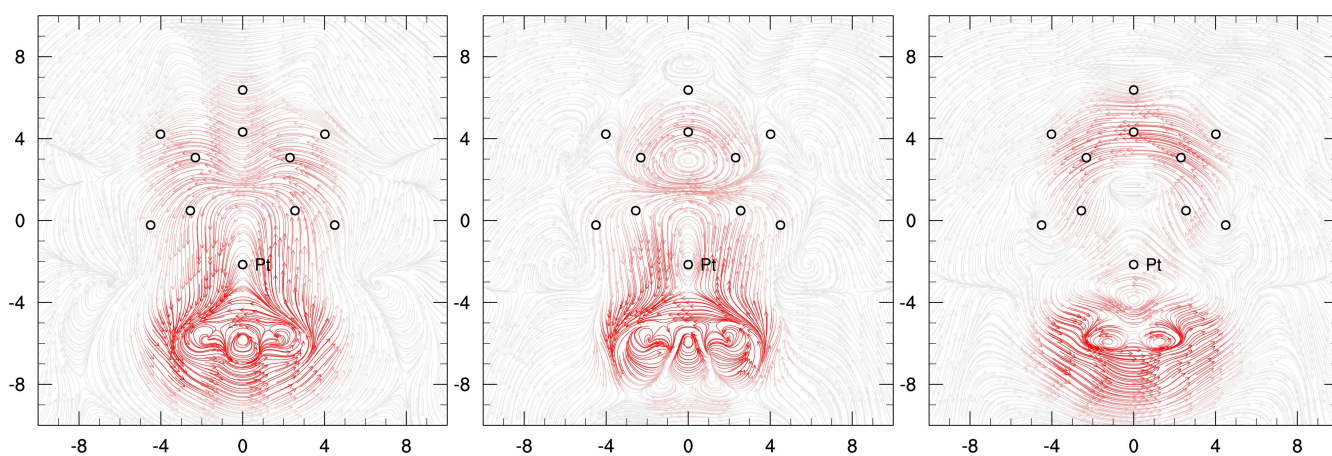

Figure S11: Plots for Magnetically Induced Current Density at  $3a_0$  from molecular plane

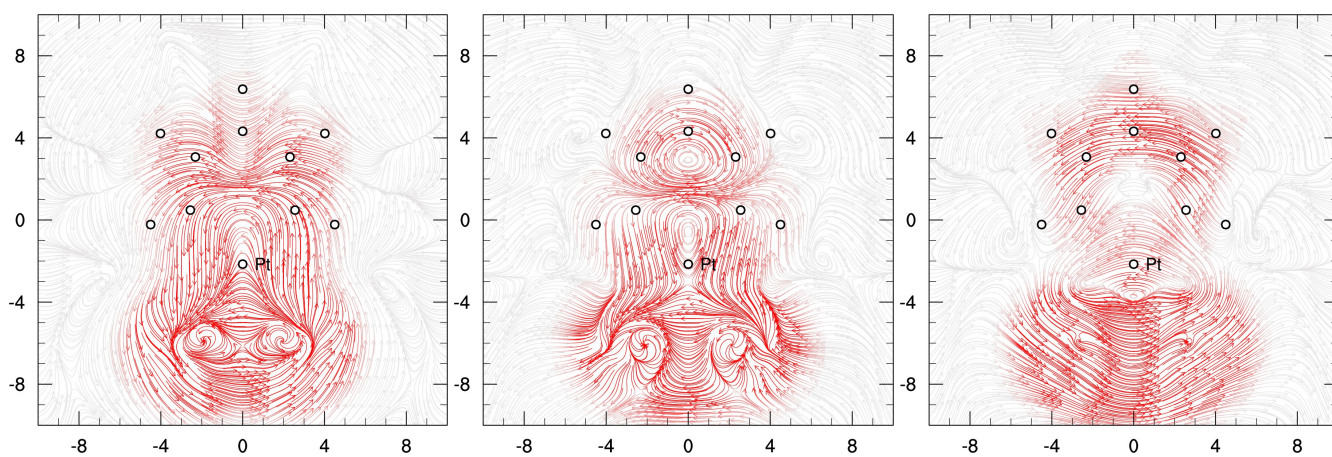

Figure S12: Plots for Magnetically Induced Current Density at  $4a_0$  from molecular plane

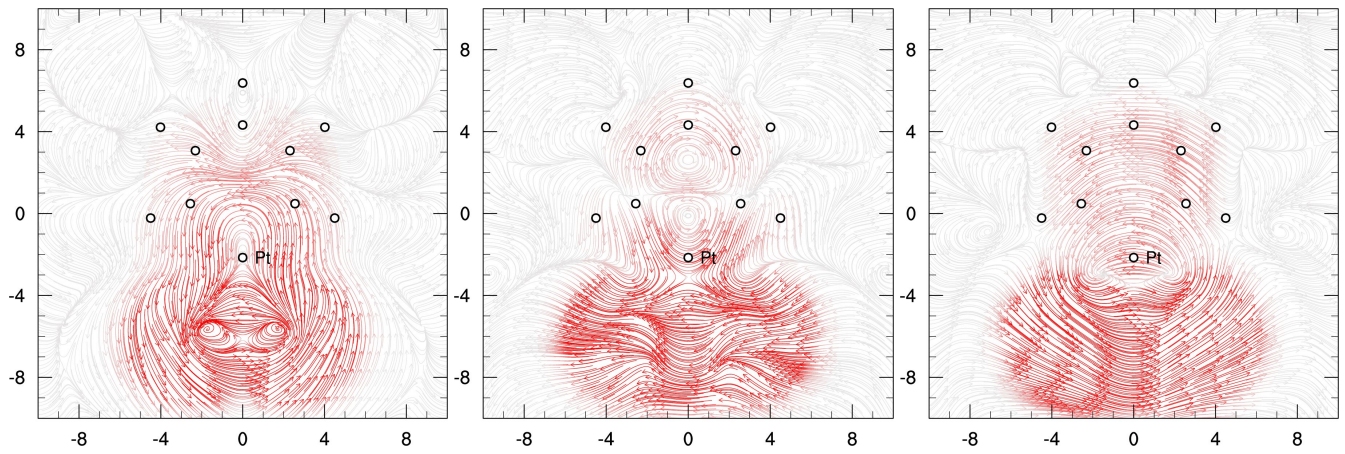

Figure S13: Plots for Magnetically Induced Current Density at  $5a_0$  from molecular plane
